# Supplementary material for: Managing depression with complementary and alternative medicine therapies: a scientometric analysis and visualization of research activities
Source: PubMed Central journal article supplement (PMC10684695; doi:10.3389/fpsyt.2023.1288346), 2023-11-15
Supplement: Data_Sheet_1.pdf [file Data_Sheet_1.pdf]

## Appendices

**Appendix 1 Categories of CAM modalities**

| Nutritional therapies                                                                                                                                                                                        | Psychological therapies                                                                                                                                                                                                                                                                                            | Physical therapies                                                                                                                                                                         | Combinations such as psychological and physical or psychological and nutritional therapies                                                                                                                  | Other Complementary Health Approaches                                                                                                                                                                                     |
|--------------------------------------------------------------------------------------------------------------------------------------------------------------------------------------------------------------|--------------------------------------------------------------------------------------------------------------------------------------------------------------------------------------------------------------------------------------------------------------------------------------------------------------------|--------------------------------------------------------------------------------------------------------------------------------------------------------------------------------------------|-------------------------------------------------------------------------------------------------------------------------------------------------------------------------------------------------------------|---------------------------------------------------------------------------------------------------------------------------------------------------------------------------------------------------------------------------|
| <ul style="list-style-type: none"> <li>● Special diets</li> <li>● Dietary supplement</li> <li>● Vitamins and minerals</li> <li>● Herbs</li> <li>● Probiotics</li> <li>● Microbial-based therapies</li> </ul> | <ul style="list-style-type: none"> <li>● Meditation</li> <li>● Hypnosis</li> <li>● Music therapies</li> <li>● Relaxation therapies (e.g., breathing exercises, guided imagery)</li> <li>● spiritual practice</li> <li>● Mindfulness-based stress reduction</li> <li>● Trager psychophysical integration</li> </ul> | <ul style="list-style-type: none"> <li>● Acupuncture</li> <li>● Massage</li> <li>● Spinal manipulation</li> <li>● Chiropractic manipulation</li> <li>● Osteopathic manipulation</li> </ul> | <ul style="list-style-type: none"> <li>● Yoga</li> <li>● Tai-chi</li> <li>● Dance therapies</li> <li>● Some forms of art therapy</li> <li>● Mindful eating</li> <li>● Qi-gong</li> <li>● Pilates</li> </ul> | <ul style="list-style-type: none"> <li>● Traditional healers</li> <li>● Ayurvedic medicine</li> <li>● Traditional Chinese medicine</li> <li>● Homeopathy</li> <li>● Naturopathy</li> <li>● Functional medicine</li> </ul> |

*Notes:* This classification criteria were proposed by the U.S. National Center for Complementary and Integrative Health

(<https://www.nccih.nih.gov/health/complementary-alternative-or-integrative-health-whats-in-a-name>)

## Appendix 2 List of search terms

| Condition             | Context                                  |
|-----------------------|------------------------------------------|
| "depression"          | "complementary and alternative medicine" |
| "depressive disorder" | "complementary medicine"                 |
| "depressive episode"  | "complementary therapy"                  |
|                       | "alternative medicine"                   |
|                       | "alternative therapy"                    |
|                       | "natural medicine"                       |
|                       | "natural therapy"                        |
|                       | "naturopathy"                            |
|                       | "integrative medicine"                   |
|                       | "integrative therapy"                    |

## Appendix 3 Search strategy for Web of Science Core Collection

| #   | Search Query                                                                       | Results    |
|-----|------------------------------------------------------------------------------------|------------|
| #1  | TS=("depressive disorder")                                                         | 49,117     |
| #2  | TS=(depression)                                                                    | 606,959    |
| #3  | TS=("depressive episode")                                                          | 5,982      |
| #4  | #3 OR #2 OR #1                                                                     | 624,148    |
| #5  | TS=("complementary and alternative medicine")                                      | 7,680      |
| #6  | TS=("complementary medicine")                                                      | 5,534      |
| #7  | TS=("complementary therapy")                                                       | 2,141      |
| #8  | TS=("alternative medicine")                                                        | 17,014     |
| #9  | TS=("alternative therapy")                                                         | 5,602      |
| #10 | TS=("natural medicine")                                                            | 979        |
| #11 | TS=("natural therapy")                                                             | 198        |
| #12 | TS=("naturopathy")                                                                 | 473        |
| #13 | TS=("integrative medicine")                                                        | 2,784      |
| #14 | TS=("integrative therapy")                                                         | 329        |
| #15 | #5 OR #6 OR #7 OR #8 OR #9 OR #10 OR #11 OR #12 OR #13 OR #14                      | 30,854     |
| #16 | #15 AND #4                                                                         | 1,822      |
| #17 | PY=(1993-2022)                                                                     | 71,050,371 |
| #18 | #17 AND #16                                                                        | 1814       |
| #19 | #17 AND #16 and English (Languages)                                                | 1766       |
| #20 | #17 AND #16 and English (Languages) and Article or Review Article (Document Types) | 1,710      |

#### Appendix 4 The top ten countries/regions with the highest productivity

| Rank | Country/Region | <i>Np</i> | % of (1710) | <i>SCP</i> | <i>MCP</i> | <i>Nc</i> |
|------|----------------|-----------|-------------|------------|------------|-----------|
| 1    | USA            | 574       | 33.5        | 519        | 55         | 24,205    |
| 2    | China          | 219       | 12.8        | 194        | 25         | 3,114     |
| 3    | Australia      | 117       | 6.8         | 85         | 32         | 1,970     |
| 4    | UK             | 91        | 5.3         | 76         | 15         | 3,637     |
| 5    | Germany        | 89        | 5.2         | 61         | 28         | 1,899     |
| 6    | Canada         | 59        | 3.5         | 47         | 12         | 1,311     |
| 7    | Iran           | 59        | 3.5         | 54         | 5          | 659       |
| 8    | Korea          | 58        | 3.4         | 51         | 7          | 721       |
| 9    | Brazil         | 38        | 2.2         | 32         | 6          | 1,211     |
| 10   | Italy          | 38        | 2.2         | 29         | 9          | 850       |

#### Abbreviations:

*Np*, number of publications; *Nc*, number of citations; *MCP*, multiple country publications; *SCP*, single country publications.

#### Appendix 5 Institutions with the highest productivity (>10 papers)

| Rank | Institution (Country)                                      | <i>Np</i> | <i>Nc</i> |
|------|------------------------------------------------------------|-----------|-----------|
| 1    | Harvard University (USA)                                   | 21        | 9,326     |
| 2    | University of Duisburg-Essen (Germany)                     | 18        | 537       |
| 3    | Chengdu University of Traditional Chinese Medicine (China) | 18        | 145       |
| 4    | University of Hong Kong (China)                            | 15        | 515       |
| 5    | University of Technology Sydney (Australia)                | 12        | 408       |
| 6    | Western Sydney University (Australia)                      | 12        | 147       |
| 7    | Northwestern University (USA)                              | 11        | 394       |

|    |                                             |    |       |
|----|---------------------------------------------|----|-------|
| 8  | University of Arizona (USA)                 | 11 | 756   |
| 9  | University of Exeter (UK)                   | 11 | 1,087 |
| 10 | University of Melbourne (Australia)         | 11 | 484   |
| 11 | University of California, Los Angeles (USA) | 10 | 3,312 |

**Abbreviations:**

*Np*, number of publications; *Nc*, number of citations.

**Appendix 6 The top ten most-published journals**

| Rank | Journal                                               | <i>Np</i> | <i>h_index</i> | <i>g_index</i> | <i>m_index</i> | <i>IF (2022-2023)</i> | <i>JCR (2022-2023)</i> | <i>Nc</i> |
|------|-------------------------------------------------------|-----------|----------------|----------------|----------------|-----------------------|------------------------|-----------|
| 1    | Journal of Alternative and Complementary Medicine     | 61        | 19             | 31             | 0.731          | 2.6                   | Q3                     | 1,193     |
| 2    | Complementary Therapies in Medicine                   | 41        | 15             | 21             | 0.882          | 3.6                   | Q2                     | 533       |
| 3    | Evidence-Based Complementary and Alternative Medicine | 40        | 18             | 30             | 0.9            | N/A                   | N/A                    | 957       |
| 4    | Medicine                                              | 33        | 5              | 11             | 0.625          | 1.6                   | Q3                     | 143       |
| 5    | BMJ Open                                              | 32        | 8              | 12             | 0.727          | 2.9                   | Q2                     | 168       |
| 6    | Complementary Therapies in Clinical Practice          | 30        | 18             | 30             | 0.947          | 3.0                   | Q2                     | 1,321     |
| 7    | Journal of Affective Disorders                        | 30        | 11             | 16             | 1              | 6.6                   | Q1                     | 303       |
| 8    | BMC Complementary Medicine and Therapies              | 24        | 14             | 20             | 0.875          | 3.9                   | Q2                     | 440       |
| 9    | Integrative Cancer Therapies                          | 23        | 13             | 23             | 0.65           | 2.9                   | Q2                     | 541       |
| 10   | Supportive Care in Cancer                             | 23        | 11             | 23             | 0.647          | 3.1                   | Q1                     | 556       |

**Abbreviations:**

*IF*, Impact Factor; *JCR*, Journal Citation Reports; *Np*, number of publications; *Nc*, number of citations.

**Appendix 7 Trend topics in research regarding CAM therapies for depression over the years**

| <b>Category</b>        | <b>Trend topics term</b>    | <b>Frequency</b> |
|------------------------|-----------------------------|------------------|
| CAM therapies/products | <i>St Johns Wort</i>        | 45               |
|                        | Mindfulness                 | 33               |
|                        | <i>Hypericum perforatum</i> | 22               |
| Mechanism of action    | Inflammation                | 14               |
|                        | Psychological stress        | 7                |
| Research tools         | Depression scale            | 23               |
|                        | Rating scale                | 8                |
| Research methods       | Meta-analysis               | 88               |
|                        | National survey             | 21               |
|                        | Clinical trials             | 20               |
| Disease                | Anxiety                     | 190              |
|                        | Cancer                      | 21               |
